# Supplementary material for: Gender Differences of Occupational Stress Associated with Suicidal Ideation among South Korean Employees: The Kangbuk Samsung Health Study
Source: PubMed Central journal article supplement — Psychiatry Investig. 2017 Nov 29;15(2):156–63. doi: 10.30773/pi.2017.05.31.1 (PMC5900399; doi:10.30773/pi.2017.05.31.1), 2017-11-29
Supplement: pi-2017-05-31-1-suppl.pdf [file pi-2017-05-31-1-suppl.pdf]

**Supplementary Table 1.** The short form of the Korean Occupational Stress Scale (KOSS-SF)

| Subscales-contents                    | Questions                                                                       |
|---------------------------------------|---------------------------------------------------------------------------------|
| Job demand                            |                                                                                 |
| Time pressure                         | Due to having many things to do, I always feel time pressure.                   |
| Increasing workload                   | My job has become increasingly overloaded.                                      |
| Insufficient rest                     | Sufficient rest is provided during work hours.                                  |
| Multiple functions                    | I have to perform various jobs simultaneously.                                  |
| Insufficient job control              |                                                                                 |
| Skill underutilization                | My work requires a high level of skill or knowledge.                            |
| Little or no decision-making          | I can make my own decisions in my job and have influence on the work.           |
| Low control                           | I can control my work pace and schedule.                                        |
| Inadequate social support             |                                                                                 |
| Inadequate supervisor support         | My supervisor is helpful in getting the job done.                               |
| Inadequate coworker support           | My coworkers are helpful in getting the job done.                               |
| Lack of emotional support             | I have someone who understands my difficulties at work.                         |
| Job insecurity                        |                                                                                 |
| Uncertainty                           | My future is uncertain because the current situation of my company is unstable. |
| Negative job change                   | Undesirable job changes (i.e., downsizing) are likely.                          |
| Organizational system                 |                                                                                 |
| Unfair organizational policy          | The organizational policies of my company are fair and reasonable.              |
| Unsatisfactory organizational support | My company provides me with sufficient organizational support.                  |
| Inter-department conflict             | Departments cooperate with each other without conflicts.                        |
| Limited communication                 | I have opportunities and channels to talk about my ideas.                       |
| Lack of reward                        |                                                                                 |
| Unfair treatment                      | I acquire respect and confidence from my company.                               |
| Future ambiguity                      | I believe that I will be given more rewards from my company if I work hard.     |
| Interruption of opportunity           | I am provided with opportunities to develop my capacity.                        |
| Occupational climate                  |                                                                                 |
| Collective culture                    | Dining out after work makes me uncomfortable.                                   |
| Inconsistency of job order            | I am asked to do my work with irrational principle or inconsistency.            |
| Authoritarian culture                 | My company climate is authoritative and hierarchical.                           |
| Sexual discrimination                 | I have disadvantages because I am a woman (man).                                |
